# Supplementary material
Source: PubMed Central journal article supplement (PMC3121465)

Supplemental Fig.1. The A $\beta$  centrifugation, oligomerization, and fractionation protocol used for this study produces a soluble fraction containing A $\beta$  species with approximate sizes equivalent to monomers, dimers, and higher order oligomers (19). **A**, A $\beta$  soluble fraction concentration graph. The A $\beta$  soluble fraction stock solution has a final concentration of approximately 15 $\mu$ M. Quantitation is based spectrophotometric measurements (OD 280) using an extinction coefficient ( $\epsilon_{280}$ ) for A $\beta$  of 1490 M<sup>-1</sup> cm<sup>-1</sup> (20), labeled “OD 280”, and on BCA measurements labeled “BCA” (n=2). **B**, Immunoblot analysis of soluble A $\beta$  stock preparation at 15 $\mu$ M and A $\beta$  diluted to 2.5 $\mu$ M in culture media, and separated on a 20% SDS-PAGE gel, using A $\beta$  antibody from Cell Signaling (# 2454). Arrows indicate species of approximate sizes equivalent to dimers (d) and tetramers (t), as well as monomers (m).

Supplemental Fig.2. Pan-tau antibody detects all recombinant tau isoforms and tau in cultured hippocampal neurons but yields no signal in lysate from tau knockout mouse brain. Lanes (left to right): “/” indicates a blank lane, “Re” indicates all six tau isoforms recombinantly produced, “15DIV” indicates wild type rat hippocampal neurons cultured in vitro for 15 days, and “KO” indicates tau knockout mouse cortical lysate. Blot was probed with pan-tau. Size standards are shown on the left, and GAPDH loading control signal is shown below pan-tau signal. Recombinant tau isoform bands are indicated.

# Supplemental Figure 1

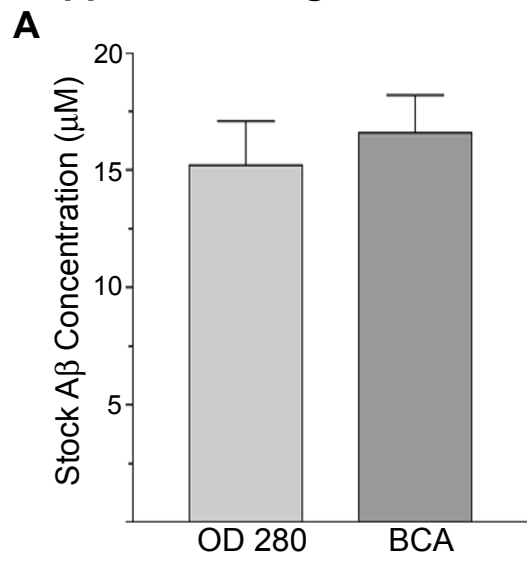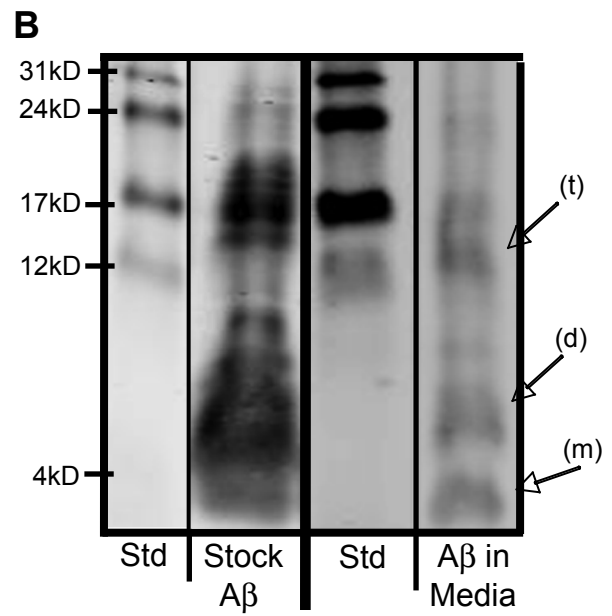

# Supplemental Figure 2

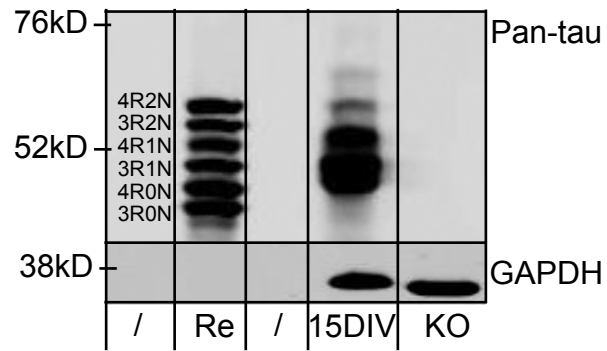

Supplement: supp_M111.234674_Supplemental.pdf [file supp_M111.234674_Supplemental.pdf]
